# Supplementary material for: Selected Cytokines in Patients with Pancreatic Cancer: A Preliminary Report
Source: PubMed Central journal article supplement (PMC4029741; doi:10.1371/journal.pone.0097613), 2014-05-21
Supplement: pone.0097613.s001.pdf [file pone.0097613.s001.pdf]

**Figure S1.** Levels of selected interleukins in patients with pancreatic cancer and healthy individuals together with their statistical comparison (means  $\pm$  standard deviation).

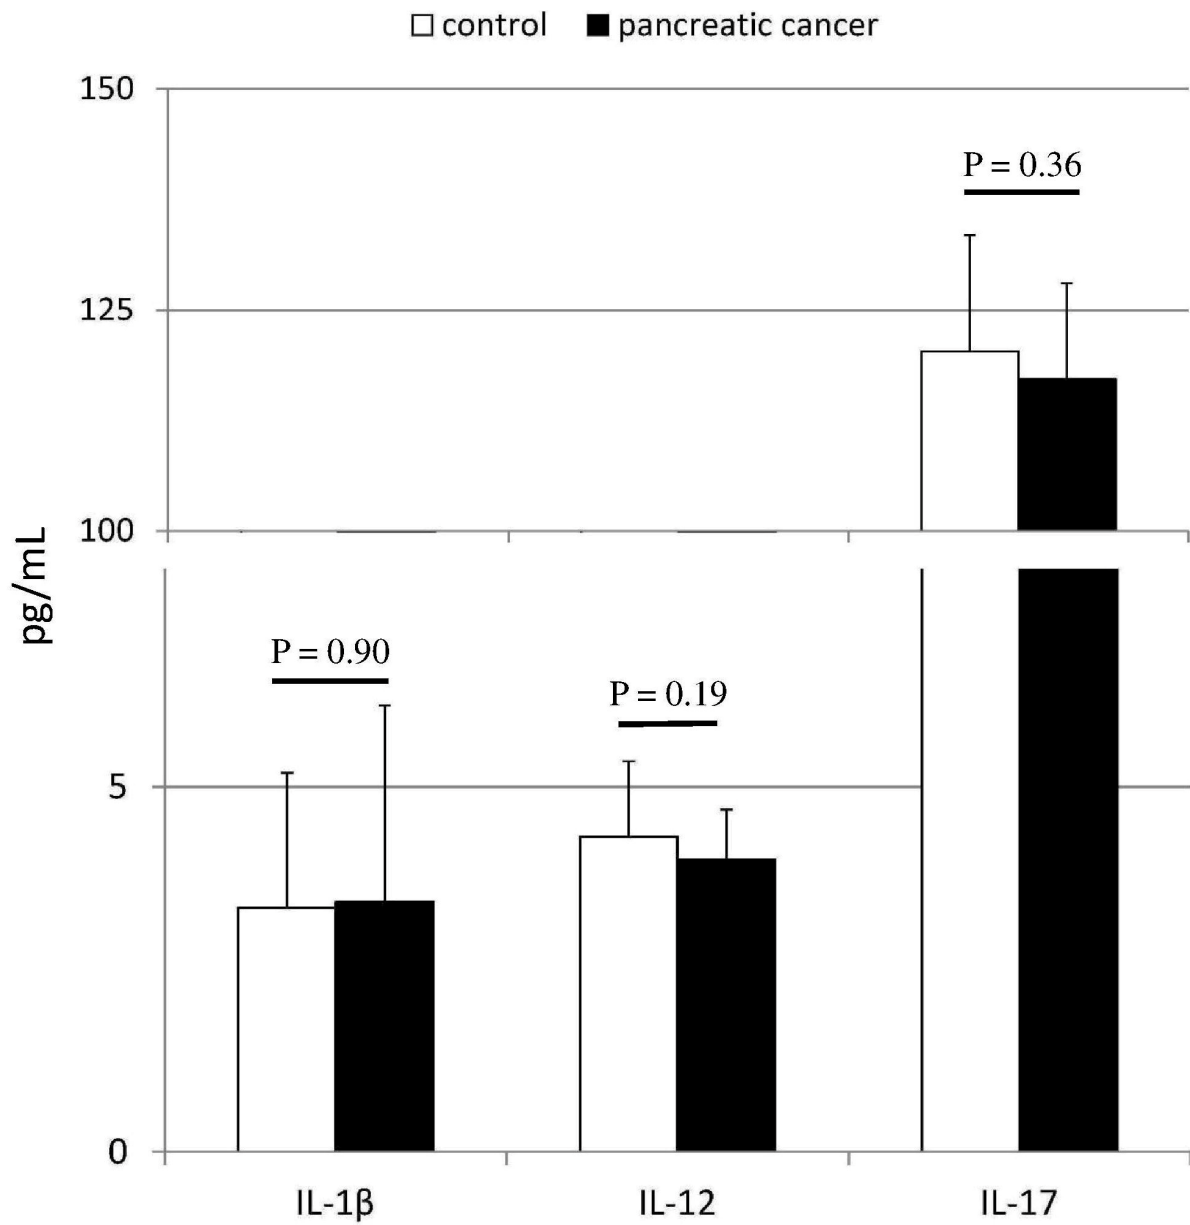

IL – interleukin

p – level of significance
