# Supplementary material for: Selected Cytokines in Patients with Pancreatic Cancer: A Preliminary Report
Source: PubMed Central journal article supplement (PMC4029741; doi:10.1371/journal.pone.0097613), 2014-05-21
Supplement: pone.0097613.s002.pdf [file pone.0097613.s002.pdf]

**Table S1. General characteristics of patients diagnosed with acute/chronic pancreatitis or pancreatic cysts (data presented as means  $\pm$  SD or median [interquartile range]).**

| <b>Parameters</b>                          | <b>“other pancreatic diseases”<br/>group</b> |
|--------------------------------------------|----------------------------------------------|
| Age (years)                                | 47 $\pm$ 10*#                                |
| Gender (M-men/W-women)                     | 31-M/14-F                                    |
| BMI (kg/m <sup>2</sup> )                   | 25.91 $\pm$ 4.12                             |
| RBC (x10 <sup>12</sup> cells/L)            | 4.27 $\pm$ 0.83                              |
| Hb (g/dL)                                  | 12.73 $\pm$ 1.80*                            |
| Platelets count (x10 <sup>9</sup> cells/L) | 313 $\pm$ 141                                |
| WBC count (x10 <sup>9</sup> cells/L)       | 8.49 $\pm$ 3.62                              |
| CRP (mg/L)                                 | 23.12 [4.28; 97.90]*#                        |
| CA19.9 (U/mL)                              | 19.81 $\pm$ 16.92#                           |

BMI – body mass index

RBC – red blood cells

Hb - hemoglobin

WBC – white blood cells

CRP – C-reactive protein

\*P<0.01 (vs control group)

#P<0.01 (vs cancer group)
