# Supplementary material for: Selected Cytokines in Patients with Pancreatic Cancer: A Preliminary Report
Source: PubMed Central journal article supplement (PMC4029741; doi:10.1371/journal.pone.0097613), 2014-05-21
Supplement: pone.0097613.s003.pdf [file pone.0097613.s003.pdf]

**Table S2.** Cytokine and C-reactive protein levels in pancreatic cancer patients, subdivided into groups according to the Tumor-Node-Metastasis (TNM) staging of malignancy (presented as means  $\pm$  SD or medians [interquartile range]).

| <b>Subgroup/<br/>Parameter</b> | <b>Early/Resectable*<br/>(n = 6)</b> | <b>Locally advanced*<br/>(n = 10)</b> | <b>Metastatic*<br/>(n = 27)</b> |
|--------------------------------|--------------------------------------|---------------------------------------|---------------------------------|
| IL-6 (pg/mL)                   | 8.75 [5.75; 11.55]                   | 10.11 [3.35; 16.84]                   | 9.88 $\pm$ 5.32                 |
| IL-8 (pg/mL)                   | 47.85 [31.03; 64.21]                 | 65.60 [52.13; 78.56]#                 | 80.45 $\pm$ 28.55#              |
| IL-10 (pg/mL)                  | 12.17 [6.62; 18.73]                  | 12.46 [4.67; 20.88]                   | 14.01 $\pm$ 9.15                |
| IL-23 (pg/mL)                  | 19.88 [7.14; 32.01]                  | 22.31 [16.24; 30.38]                  | 22.19 $\pm$ 7.90                |
| TNF $\alpha$ (pg/mL)           | 11.35 [9.98; 12.72]                  | 10.09 [5.86; 14.34]                   | 14.55 $\pm$ 10.68               |
| CRP (mg/L)                     | 11.7 [4.8; 15.9]                     | 17.6 [5.1; 29.3]                      | 19.0 [5.4; 64.9]                |

\* “Early/Resectable” patients were classified as TNM Stage 1 or 2; “Locally advanced” represented TNM Stage 3 and “Metastatic” TNM Stage 4

CRP – C-reactive protein

IL – interleukin

TNF $\alpha$  – tumor necrosis factor alpha

# p < 0.05 (vs “Early/Resectable” group)
