# Supplementary material for: Selected Cytokines in Patients with Pancreatic Cancer: A Preliminary Report
Source: PubMed Central journal article supplement (PMC4029741; doi:10.1371/journal.pone.0097613), 2014-05-21
Supplement: pone.0097613.s004.pdf [file pone.0097613.s004.pdf]

**Table S3.** Levels of examined cytokines in patients with other malignancies (NETs and SPTs) together with their statistical comparison (medians [interquartile range]).

| <b>Cytokine</b><br>[pg/ml] | <b>other malignancies</b><br><b>group</b> | <b>p</b><br><b>vs control</b> | <b>p</b><br><b>vs cancer</b> |
|----------------------------|-------------------------------------------|-------------------------------|------------------------------|
| IL-1                       | 3.08 [2.52 ; 3.44]                        | 0.64                          | 0.48                         |
| IL-6                       | 7.70 [3.66 ; 9.95]                        | 0.08                          | 0.82                         |
| IL-8                       | 56.32 [13.7 ; 89.18]                      | 0.48                          | <b>0.05</b>                  |
| IL-10                      | 6.50 [5.10 ; 8.38]                        | 0.30                          | 0.60                         |
| IL-12                      | 3.50 [3.00 ; 4.55]                        | 0.20                          | 0.35                         |
| IL-17                      | 115.7 [105.5 ; 130.0]                     | 0.65                          | 0.97                         |
| IL-23                      | 72.74 [57.88 ; 83.22]                     | <b>0.007</b>                  | <b>0.002</b>                 |
| TNF $\alpha$               | 6.30 [5.36 ; 8.34]                        | 0.63                          | <b>0.03</b>                  |
| G-CSF                      | 36.40 [29.85 ; 38.65]                     | 0.81                          | 0.32                         |

IL – interleukin

p – level of significance

TNF $\alpha$  – tumor necrosis factor alpha

G-CSF – granulocyte-colony stimulating factor
