# Supplementary material for: Selected Cytokines in Patients with Pancreatic Cancer: A Preliminary Report
Source: PubMed Central journal article supplement (PMC4029741; doi:10.1371/journal.pone.0097613), 2014-05-21
Supplement: pone.0097613.s005.pdf [file pone.0097613.s005.pdf]

**Table S4. Coefficients of correlations between absolute numbers of circulating bone marrow-derived stem cells` populations and systemic levels of examined cytokines in patients with pancreatic *adenocarcinoma* (n = 8).**

| stem cells population/parameter   | IL-6         | IL-8         | IL-10        | IL-23         |
|-----------------------------------|--------------|--------------|--------------|---------------|
| <b>Pancreatic cancer patients</b> |              |              |              |               |
| VSEL                              | NS           | NS           | NS           | <b>-0.65#</b> |
| MSC                               | <b>0.96*</b> | <b>0.98*</b> | <b>0.71#</b> | <b>-0.62#</b> |
| HSC                               | NS           | NS           | NS           | NS            |
| EPC                               | NS           | NS           | NS           | NS            |

#P<0.05      \*P<0.005      P – level of significance      NS – not significant

VSEL – very small embryonic-like stem cells

MSC – mesenchymal stem cells

HSC – hematopoietic stem cells

EPC – endothelial progenitor cells
